# Supplementary material for: Impact of Definitive Drug–Drug Interaction Testing on Medication Management and Patient Care
Source: PubMed Central journal article supplement — Drugs Real World Outcomes. 2018 Oct 8;5(4):217–24. doi: 10.1007/s40801-018-0143-z (PMC6265235; doi:10.1007/s40801-018-0143-z), 2018-10-08
Supplement: 40801_2018_143_MOESM1_ESM.pdf [file 40801_2018_143_MOESM1_ESM.pdf]

# Impact of Definitive Drug-Drug Interaction Testing on Medication Management and Patient Care

## Drugs – Real World Outcomes

Renée JG Arnold, Alison Tradonsky, Jun Tang, Joshua Schrecker, Cheryl Hild

\*Corresponding author:

Renée JG Arnold, PharmD

Arnold Consultancy & Technology, LLC

15 West 72<sup>nd</sup> Street – 23<sup>rd</sup> Floor, New York, NY 10023

917-945-3267

[rarnold@arnoldllc.com](mailto:rarnold@arnoldllc.com); [renee.arnold@mssm.edu](mailto:renee.arnold@mssm.edu)

## Appendix I. Excerpt of laboratory report

### Laboratory Report

#### Clinic Information

Client: Healthcare Client  
123 Any St  
Anytown, US 12345  
Requesting Provider:  
Dr. John Doe

#### Patient Information

Patient Name: Jane Doe  
  
Patient ID:  
Date of Birth: 12/01/1984  
Male/Female: Female

#### Sample Information

Lab Sample ID: 12345678  
Specimen Type: Urine  
Collected: 3/22/2018  
Received: 3/23/2018  
Reported: 3/25/2018

#### Medication(s) Prescribed

Oxycodone

#### Test(s) Requested

00197IU - QMP Plus D/L  
00021 - Drug-Drug Interaction (DDI)

| Medication Compliance   |                       |                   |                                                              |
|-------------------------|-----------------------|-------------------|--------------------------------------------------------------|
| Drug and/or Metabolites | Result Interpretation | Normalized Result | Comment                                                      |
| Oxycodone               | PRESENT               | 7,000 ng/mL       | Test result is consistent and expected with prescribed drug. |

| Drug-Drug Interaction (DDI)    |                    |                      |                                                                                                                                                                                                                                      |
|--------------------------------|--------------------|----------------------|--------------------------------------------------------------------------------------------------------------------------------------------------------------------------------------------------------------------------------------|
| Potential Interaction Detected |                    | Interaction Severity | Interaction Description                                                                                                                                                                                                              |
| Oxycodone                      | Ritonavir (Norvir) | SEVERE               | The concurrent administration of a CYP3A4 inhibitor may result in elevated levels of and toxicity from alfentanil, fentanyl(1,2) hydrocodone(3) and oxycodone(4), including somnolence and potentially fatal respiratory depression. |
| Darunavir (Prezista)           | Oxycodone          | MODERATE             | The concurrent administration of a CYP3A4 inhibitor may result in elevated levels of and toxicity from alfentanil, fentanyl(1,2) and oxycodone(3), including somnolence and potentially fatal respiratory depression.                |

Citations in interaction descriptions can be provided as needed. Please contact Clinical Scientists at 1-877-552-3232 for more information.
