# Supplementary material for: Impact of Definitive Drug–Drug Interaction Testing on Medication Management and Patient Care
Source: PubMed Central journal article supplement — Drugs Real World Outcomes. 2018 Oct 8;5(4):217–24. doi: 10.1007/s40801-018-0143-z (PMC6265235; doi:10.1007/s40801-018-0143-z), 2018-10-08
Supplement: 40801_2018_143_MOESM3_ESM.pdf [file 40801_2018_143_MOESM3_ESM.pdf]

# Impact of Definitive Drug-Drug Interaction Testing on Medication Management and Patient Care

Drugs – Real World Outcomes

Renée JG Arnold, Alison Tradonsky, Jun Tang, Joshua Schrecker, Cheryl Hild

\*Corresponding author:

Renée JG Arnold, PharmD

Arnold Consultancy & Technology, LLC

15 West 72<sup>nd</sup> Street – 23<sup>rd</sup> Floor, New York, NY 10023

917-945-3267

[rarnold@arnoldllc.com](mailto:rarnold@arnoldllc.com); [renee.arnold@mssm.edu](mailto:renee.arnold@mssm.edu)

Appendix II: Pain-related CPT codes found in EMR data

| CPT code | Description                                                                                  |
|----------|----------------------------------------------------------------------------------------------|
| 20552    | Trigger Point Injections                                                                     |
| 20610    | arthrocentesis, aspiration and/or injection                                                  |
| 27096    | injection procedure for sacroiliac joint, anesthetic/steroid, with image guidance            |
| 64615    | Destruction neurolytic procedure                                                             |
| 72040    | Under Diagnostic Radiology (Diagnostic Imaging) Procedures of the Spine and Pelvis.          |
| 72070    | Diagnostic Radiology (Diagnostic Imaging) Procedures of the Spine and Pelvis                 |
| 72110    | Under Diagnostic Radiology (Diagnostic Imaging) Procedures of the Spine and Pelvis           |
| 90791    | biopsychosocial assessment                                                                   |
| 90834    | 90834. Psychotherapy, 45 minutes with patient and/or family member                           |
| 95923    | Under Autonomic Function Testing Procedures                                                  |
| 96103    | psychological testing                                                                        |
| 96372    | Under Therapeutic, Prophylactic, and Diagnostic Injections and Infusions                     |
| 99203    | Office or other outpatient visit                                                             |
| 99211    | office or other outpatient visit                                                             |
| 99212    | established outpatient visit                                                                 |
| 99213    | Established patient visit                                                                    |
| 99214    | office or other outpatient visit for the evaluation and management of an established patient |
| 99215    | Office or other outpatient visit for an established patient                                  |
| 99395    | Under Established Patient Preventive Medicine Services                                       |
| 99396    | Established patient comprehensive preventive medicine reevaluation                           |
